# Supplementary material for: Involvement of 3′,5′‐cyclic inosine monophosphate in cystathionine γ‐lyase‐dependent regulation of the vascular tone
Source: PubMed Central journal article supplement — Br J Pharmacol. 2021 Jun 11;178(18):3765–82. doi: 10.1111/bph.15516 (PMC8453910; doi:10.1111/bph.15516), 2021-06-11
Supplement: BPH-178-3765-s001.pdf [file BPH-178-3765-s001.pdf]

# Supplemental figure 1

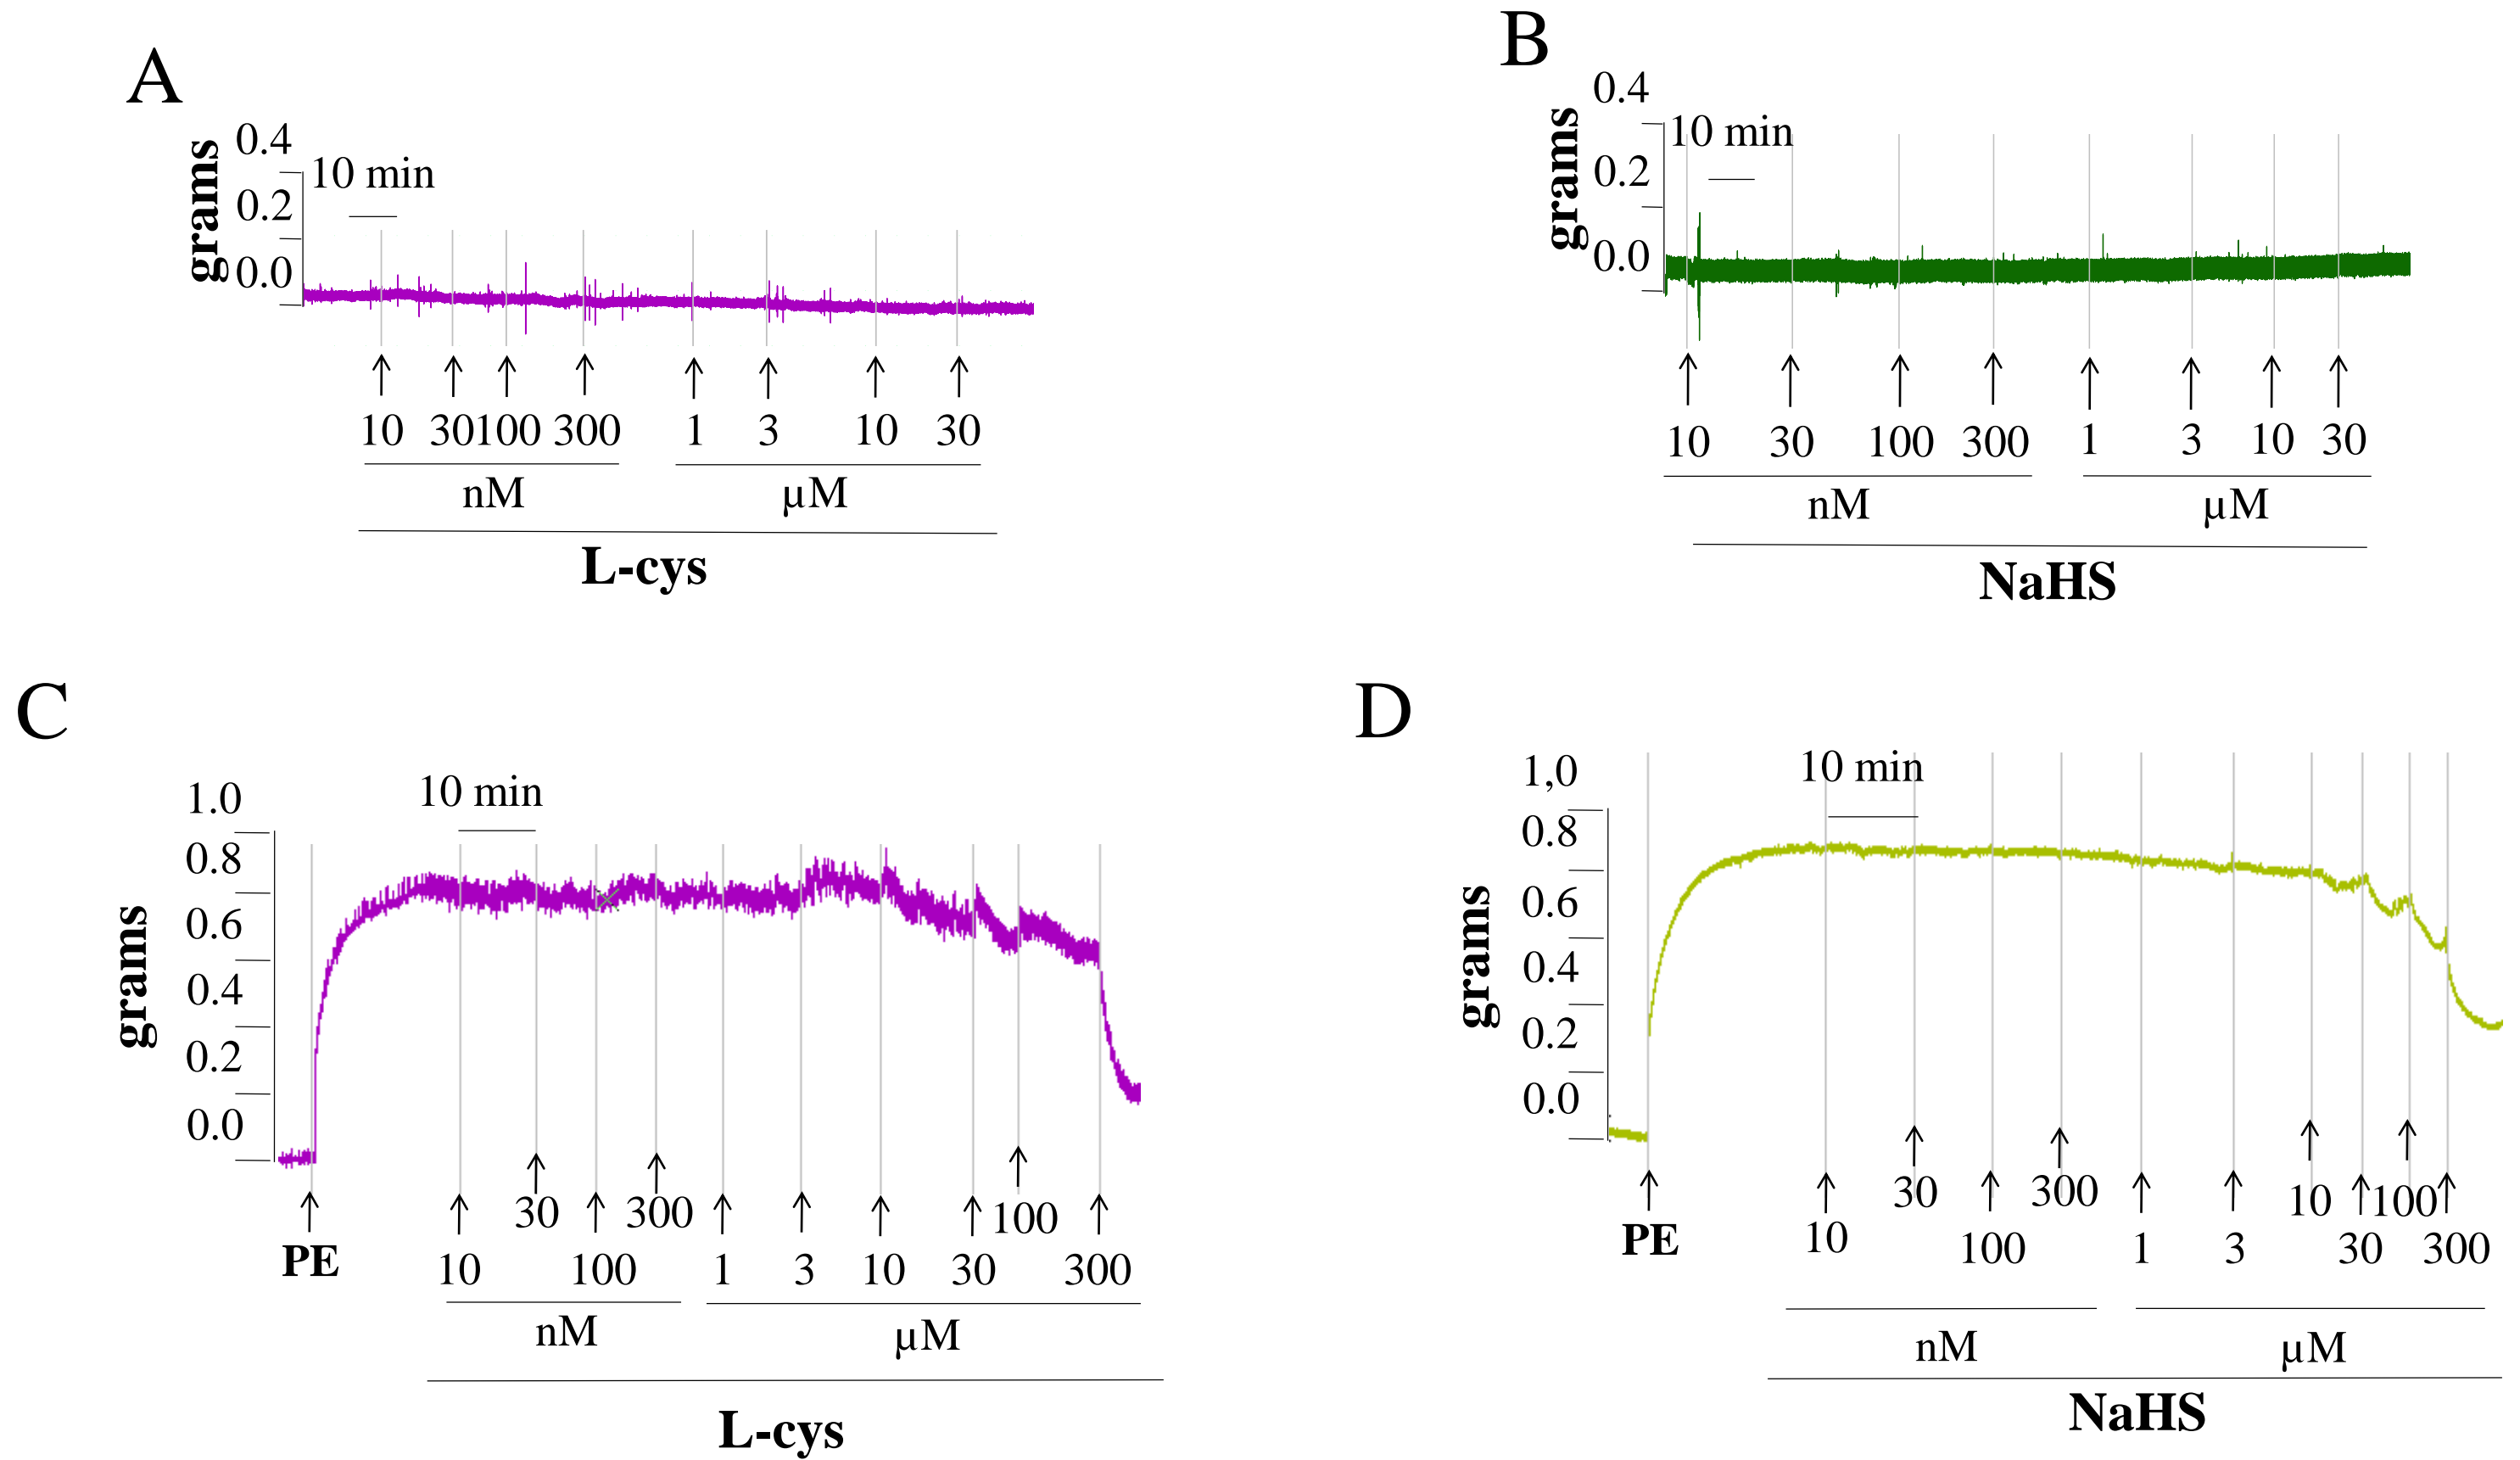

**Supplemental figure 1.** Both L-cysteine (A) and NaHS (B) do not induce contraction on basal tone of aorta rings (original traces). In mice younger than 20 weeks, both L-cysteine (C) and NaHS (D) fail to induce further increase in tension on PE induced stable tone (original trace)
